# Supplementary material for: Condensed phase behaviour of ionic liquid–benzene mixtures: congruent melting of a [emim][NTf2]·C6H6inclusion crystal
Source: Royal Society of Chemistry journal article supplement (doi:10.1039/b602675c), 2006-01-01
Supplement: b602675c.pdf [file b602675c.pdf]

## Electronic Supplementary Information

### Condensed phase behaviour of ionic liquid–benzene mixtures: Congruent melting of a [emim][NTf<sub>2</sub>] $\cdot$ C<sub>6</sub>H<sub>6</sub> inclusion crystal

Joanna Łachwa,<sup>a</sup> Isabel Bento,<sup>a</sup> M. Teresa Duarte,<sup>b</sup> José N. Canongia Lopes<sup>a,b</sup> and Luís P.N. Rebelo<sup>aa</sup>

<sup>a</sup> Instituto de Tecnologia Química e Biológica, UNL, Av. República, Ap. 127, 2780-901 Oeiras, Portugal. E-mail: [luis.rebelo@itqb.unl.pt](mailto:luis.rebelo@itqb.unl.pt)

<sup>b</sup> Centro de Química Estrutural, Complexo I, Instituto Superior Técnico, 1049-001 Lisboa, Portugal

<sup>a</sup>Corresponding author: [luis.rebelo@itqb.unl.pt](mailto:luis.rebelo@itqb.unl.pt)

## Experimental

### *Materials*

1-ethyl-3-methylimidazolium bis{(trifluoromethyl)sulfonyl}amide, [emim][NTf<sub>2</sub>], was synthesised at QUILL (The Queen's University Ionic Liquid Laboratories, Belfast) according to methods found elsewhere,<sup>1</sup> where it underwent first-stage purification. The ionic liquid was washed several times with water to decrease the chloride content. It was confirmed that no precipitation (of AgCl) occurred by adding AgNO<sub>3</sub> to the wash water. NMR analyses showed no major impurities in the untreated, original sample, except for the presence of water. Samples of [emim][NTf<sub>2</sub>] were further thoroughly degassed, dried, and freed from any small traces of volatile compounds by applying vacuum (0.1 Pa) at moderate temperatures (60-80 °C) for typically 48 h. Then, both the water and chloride contents were analysed. Karl-Fischer titrations revealed very low levels of water (70 ppm) for the treated ionic liquid, as compared with a value of 3900 ppm of water for the untreated sample. The Cl<sup>-</sup> specific electrode using the standard addition method has shown a chloride content of 30 ppm. For the determination of the phase diagram - either by the visual method or the DSC - fresh samples of the ionic liquids kept under vacuum were always used immediately prior to the measurements. Benzene (99.5% for analysis ACS-ISO) was purchased from Panreac. Benzene samples were further dried with 3Å molecular sieves. [emim][NTf<sub>2</sub>] + benzene mixtures were gravimetrically prepared and the error in the weight fraction composition is estimated to be within  $\pm 2 \times 10^{-5}$ .

### *Phase transition determinations*

#### *Visual method*

The solid-liquid equilibrium temperatures at 0.1 MPa nominal pressure were determined using a dynamic method described in detail previously<sup>2</sup>. The appropriate mixtures of the ionic liquid and benzene were placed in a Pyrex glass cell and inserted in a thermostatic bath filled with a mixture of ethanol and liquid nitrogen. After solidification, the samples were heated very slowly (less than 2 K·h<sup>-1</sup> near the equilibrium temperature) with continuous

stirring inside the cell until melting occurred. The temperature at which the last crystal disappeared was taken as the temperature of the solid-liquid equilibrium. The crystal disappearance temperatures, detected visually (naked eye determination) were measured using a 4-wire platinum resistance thermometer coupled to a Keithley 199 System DMM/Scanner. The thermometer was calibrated against high accuracy mercury thermometers ( $\pm 0.01$  K). The temperature's accuracy is  $\pm 0.05$  K and that of the mole fraction did not exceed  $\pm 0.0005$ . The overall uncertainty of the transition temperature measurements, resulting from the visual observation of the disappearance of the last crystals is obviously greater than the instrumental error and is estimated to be  $\pm 1$  K.

### ***Crystallographic Information***

(See CIF file)

### **References:**

1. P. Bonhôte, A.-P. Dias, M. Armand, N. Papageorgiou, K. Kalyanasundaram, M. Gratzel, *Inorg. Chem.* 1996, **35**, 1168-1178.
2. U. Domańska, *Fluid Phase Equilib.*, 1986, **26**, 201-220.

## RESULTS

### *Differential Scanning Calorimetry*

The runs (Fig. S1) were performed in a 2920 MDSC system from TA Instruments Inc. using about 5-12 mg of sample and a heating ramp of 0.01 K/s between 240 and 290 K.

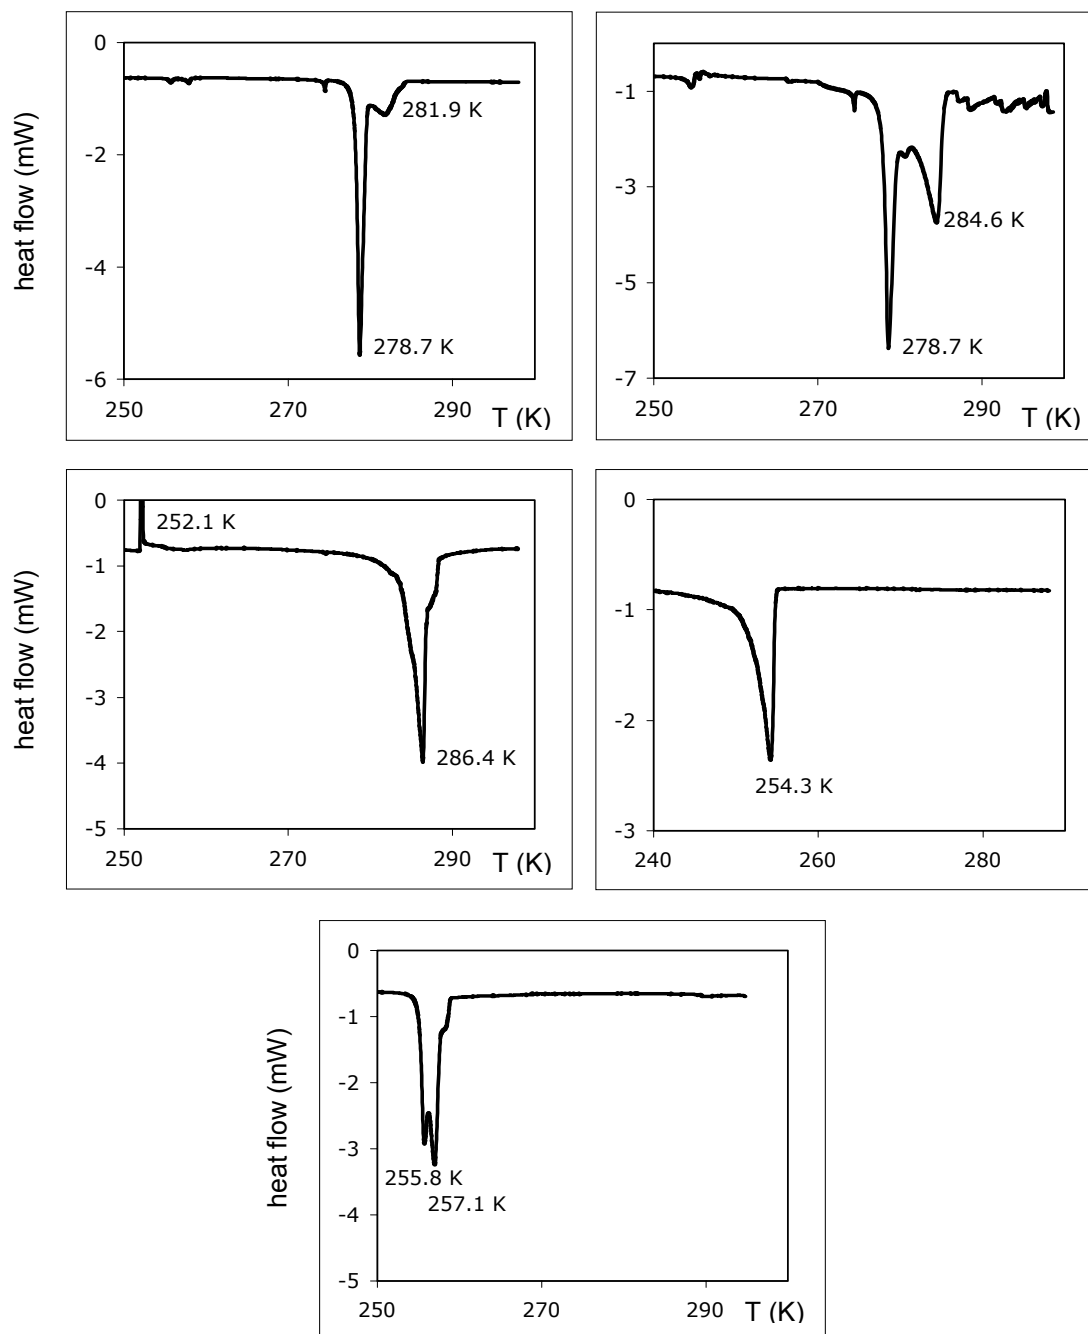

Figure S1 Differential Scanning Calorimetry thermograms of  $[\text{emim}][\text{NTf}_2] + \text{C}_6\text{H}_6$  mixtures: (a)  $0.24 x_{\text{IL}}$ ; (b)  $0.33 x_{\text{IL}}$ ; (c)  $0.45 x_{\text{IL}}$ ; (d)  $0.50 x_{\text{IL}}$ ; (e)  $0.88 x_{\text{IL}}$ . The sharp positive peak shown in graph (c) corresponds to the crystallization of the inclusion compound upon melting of the metastable solid phase during the heating ramp. Graphs (d) and (e) show only the melting of the metastable solid phase (no inclusion crystal was formed).

**Transition temperature data**

TABLE S1. Experimental data (visual and DSC) of solid-liquid and liquid-liquid equilibria for 1-ethyl-3-methylimidazolium bis{(trifluoromethyl)sulfonyl}amide, [emim][NTf<sub>2</sub>], + benzene.

| $x_{IL}$ | $w_{IL}$ | T / K              | $x_{IL}$ | $w_{IL}$ | T / K                | $x_{IL}$ | $w_{IL}$ | T / K                |
|----------|----------|--------------------|----------|----------|----------------------|----------|----------|----------------------|
| 0.0000   | 0.0000   | 279.6              | 0.3103   | 0.6927   | 270.2 <sup>b</sup>   | 0.4591   | 0.8096   | 287.1                |
| 0.0313   | 0.1393   | 279.7              | 0.3115   | 0.6939   | 283.4                | 0.4656   | 0.8136   | 287.3                |
| 0.0824   | 0.3102   | 279.6              | 0.3115   | 0.6939   | 273.7 <sup>b</sup>   | 0.4760   | 0.8198   | 287.6                |
| 0.0998   | 0.3570   | 280.2              | 0.3194   | 0.7016   | 284.6 <sup>a</sup>   | 0.4859   | 0.8256   | 287.7                |
| 0.1163   | 0.3972   | 279.5              | 0.3194   | 0.7016   | 278.7 <sup>a</sup>   | 0.4909   | 0.8285   | 288.0                |
| 0.1393   | 0.4477   | 279.6              | 0.3247   | 0.7066   | 269.0 <sup>b</sup>   | 0.4991   | 0.8331   | 254.3 <sup>a,b</sup> |
| 0.1402   | 0.4496   | 279.5              | 0.3250   | 0.7069   | 270.3 <sup>b</sup>   | 0.5085   | 0.8382   | 288.3                |
| 0.1513   | 0.4718   | 279.5              | 0.3326   | 0.7140   | 284.2                | 0.5260   | 0.8475   | 253.1 <sup>b</sup>   |
| 0.1688   | 0.5043   | 279.2              | 0.3380   | 0.7190   | 268.4 <sup>b</sup>   | 0.5260   | 0.8475   | 288.1                |
| 0.1795   | 0.5228   | 279.4              | 0.3394   | 0.7201   | 284.6                | 0.5519   | 0.8605   | 287.8                |
| 0.1909   | 0.5418   | 279.1              | 0.3401   | 0.7208   | 266.6 <sup>b</sup>   | 0.5612   | 0.8650   | 287.5                |
| 0.2013   | 0.5580   | 279.1              | 0.3497   | 0.7293   | 266.8 <sup>b</sup>   | 0.5793   | 0.8734   | 286.8                |
| 0.2141   | 0.5771   | 279.2              | 0.3533   | 0.7324   | 264.7 <sup>b</sup>   | 0.6074   | 0.8857   | 286.8                |
| 0.2142   | 0.5773   | 278.5              | 0.3543   | 0.7332   | 285.2                | 0.6126   | 0.8879   | 286.3                |
| 0.2222   | 0.5887   | 278.9              | 0.3576   | 0.7361   | 284.9                | 0.6195   | 0.8908   | 286.4                |
| 0.2222   | 0.5887   | 293.0 <sup>c</sup> | 0.3596   | 0.7377   | 268.3 <sup>b</sup>   | 0.6429   | 0.9002   | 250.7 <sup>b</sup>   |
| 0.2234   | 0.5903   | 280.0              | 0.3671   | 0.7440   | 264.0 <sup>b</sup>   | 0.6533   | 0.9042   | 286.0                |
| 0.2264   | 0.5945   | 278.6 <sup>b</sup> | 0.3691   | 0.7456   | 263.0 <sup>b</sup>   | 0.6618   | 0.9074   | 285.9                |
| 0.2264   | 0.5945   | 301.9 <sup>c</sup> | 0.3755   | 0.7508   | 266.6 <sup>b</sup>   | 0.6912   | 0.9181   | 285.1                |
| 0.2270   | 0.5953   | 277.6 <sup>b</sup> | 0.3800   | 0.7544   | 285.5                | 0.7246   | 0.9295   | 253.8 <sup>b</sup>   |
| 0.2334   | 0.6039   | 278.4 <sup>b</sup> | 0.3860   | 0.7590   | 262.9 <sup>b</sup>   | 0.7383   | 0.9339   | 283.5                |
| 0.2343   | 0.6052   | 281.0              | 0.3943   | 0.7653   | 264.6 <sup>b</sup>   | 0.7658   | 0.9425   | 282.5                |
| 0.2343   | 0.6052   | 278.8              | 0.3943   | 0.7653   | 285.8                | 0.7896   | 0.9495   | 281.4                |
| 0.2350   | 0.6061   | 279.8              | 0.3944   | 0.7654   | 286.0                | 0.7919   | 0.9502   | 281.2                |
| 0.2411   | 0.6141   | 281.8 <sup>a</sup> | 0.3958   | 0.7664   | 264.6 <sup>b</sup>   | 0.8052   | 0.9539   | 254.9 <sup>b</sup>   |
| 0.2411   | 0.6141   | 278.7 <sup>a</sup> | 0.4033   | 0.7720   | 261.2 <sup>b</sup>   | 0.8275   | 0.9601   | 279.4                |
| 0.2461   | 0.6205   | 281.0              | 0.4098   | 0.7767   | 286.3                | 0.8447   | 0.9646   | 278.2                |
| 0.2469   | 0.6216   | 282.2              | 0.4137   | 0.7795   | 261.9 <sup>b</sup>   | 0.8466   | 0.9651   | 256.4 <sup>b</sup>   |
| 0.2493   | 0.6245   | 276.5 <sup>b</sup> | 0.4175   | 0.7821   | 286.8                | 0.8740   | 0.9720   | 275.6                |
| 0.2601   | 0.6378   | 281.3              | 0.4211   | 0.7847   | 258.0 <sup>b</sup>   | 0.8819   | 0.9740   | 255.1 <sup>a,b</sup> |
| 0.2610   | 0.6389   | 281.9              | 0.4265   | 0.7884   | 286.8                | 0.8819   | 0.9740   | 257.0 <sup>a,b</sup> |
| 0.2629   | 0.6411   | 275.4 <sup>b</sup> | 0.4353   | 0.7943   | 286.7                | 0.9100   | 0.9806   | 270.4                |
| 0.2747   | 0.6549   | 282.0              | 0.4356   | 0.7945   | 286.8                | 0.9166   | 0.9822   | 269.2                |
| 0.2776   | 0.6582   | 282.3              | 0.4448   | 0.8005   | 287.0                | 0.9518   | 0.9900   | 262.7                |
| 0.2789   | 0.6595   | 273.8 <sup>b</sup> | 0.4527   | 0.8056   | 286.4 <sup>a</sup>   | 0.9565   | 0.9910   | 260.9                |
| 0.2920   | 0.6738   | 282.7              | 0.4527   | 0.8056   | 252.0 <sup>a,b</sup> | 1.0000   | 1.0000   | 258.5                |
| 0.2951   | 0.6771   | 272.0 <sup>b</sup> | 0.4553   | 0.8072   | 287.3                |          |          |                      |

<sup>a</sup> DSC, <sup>b</sup> meta-stable phase diagram, <sup>c</sup> LLE
